# Supplementary material
Source: Springer Nature journal article supplement (https://www.springermedizin.de/resource/supplementary/12957_2009_640_MOESM8_ESM.pdf/9565390)

**a**

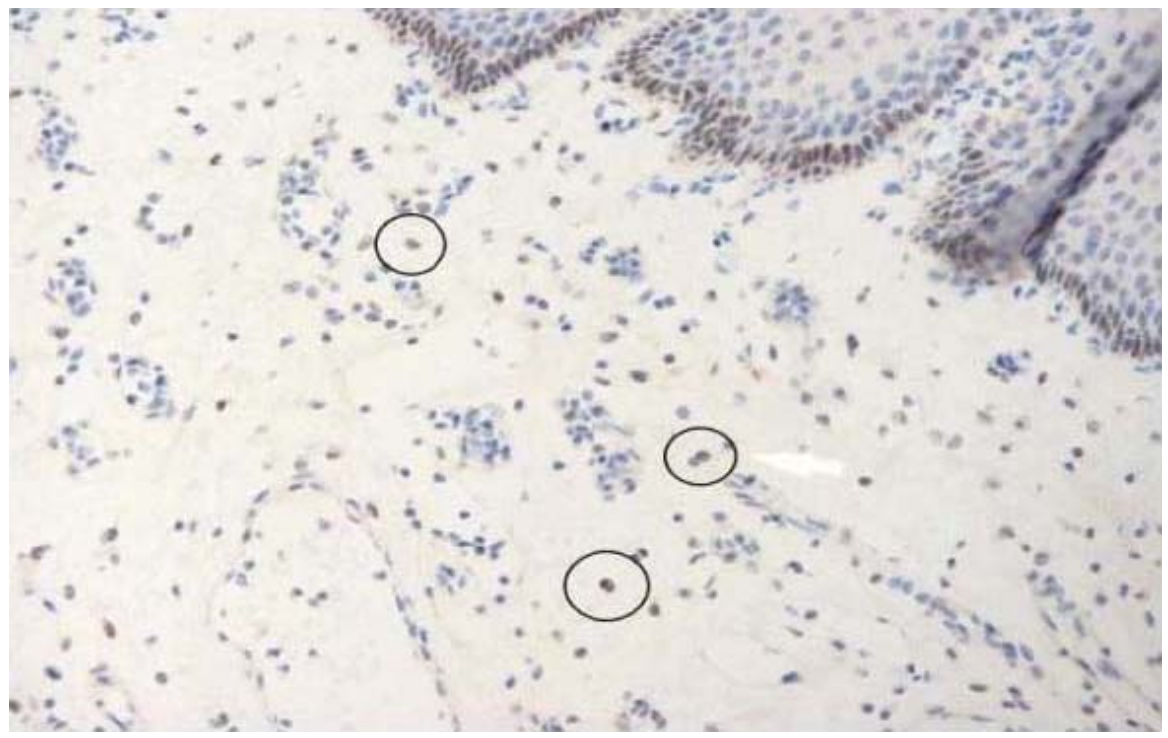

**b**

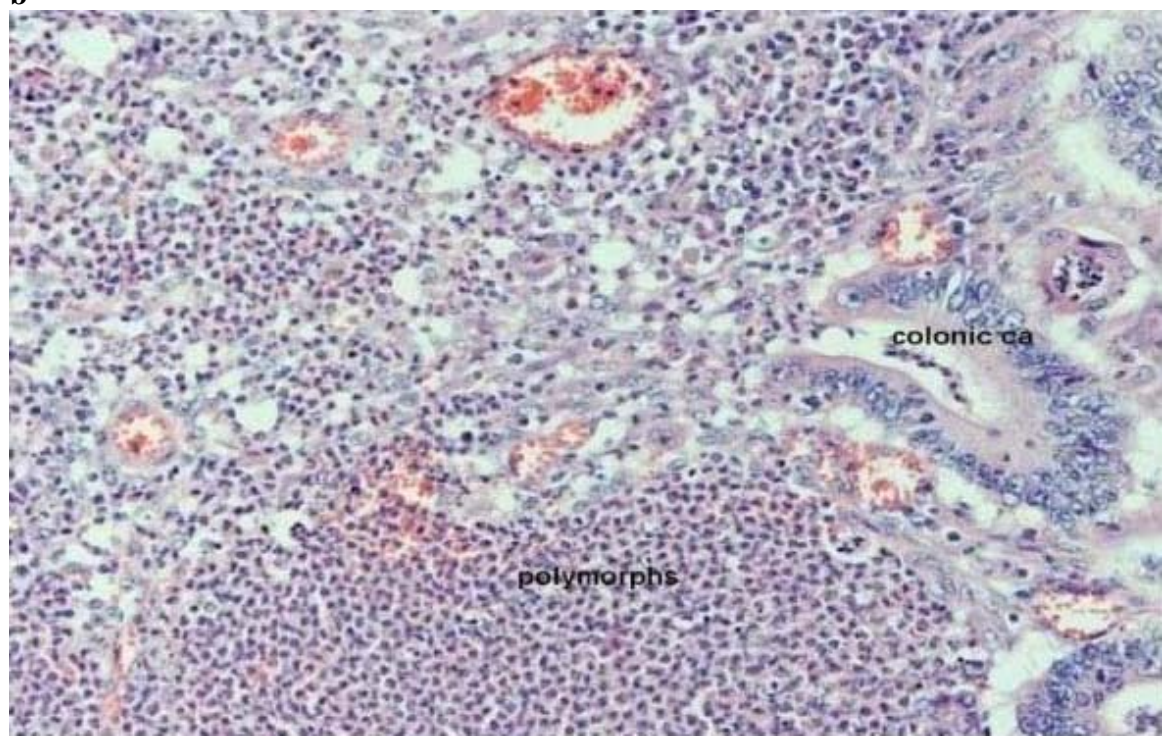

Supplement: MOESM8 [file 9565390]
